# Supplementary figures and images for: Protective Effect of Gochujang on Inflammation in a DSS-Induced Colitis Rat Model
Source: MDPI journal article supplement (doi:10.3390/foods10051072), 2021-05-12

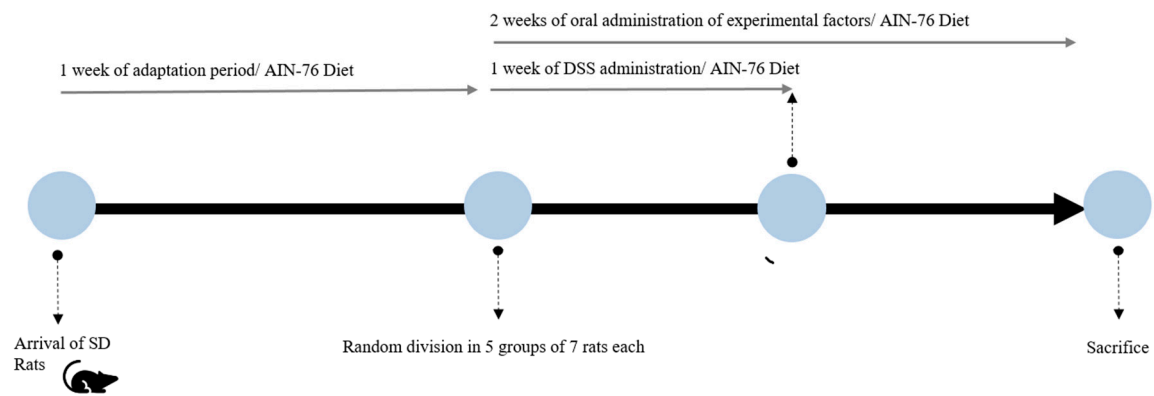

Figure S1. Scheme of the animal study.

Supplement: s1 [file s1]
